# Supplementary figures and images for: Dehydration of fructose into 5-hydroxymethylfurfural in acidic ionic liquids
Source: Royal Society of Chemistry journal article supplement (doi:10.1039/c1ra00088h), 2011-01-01

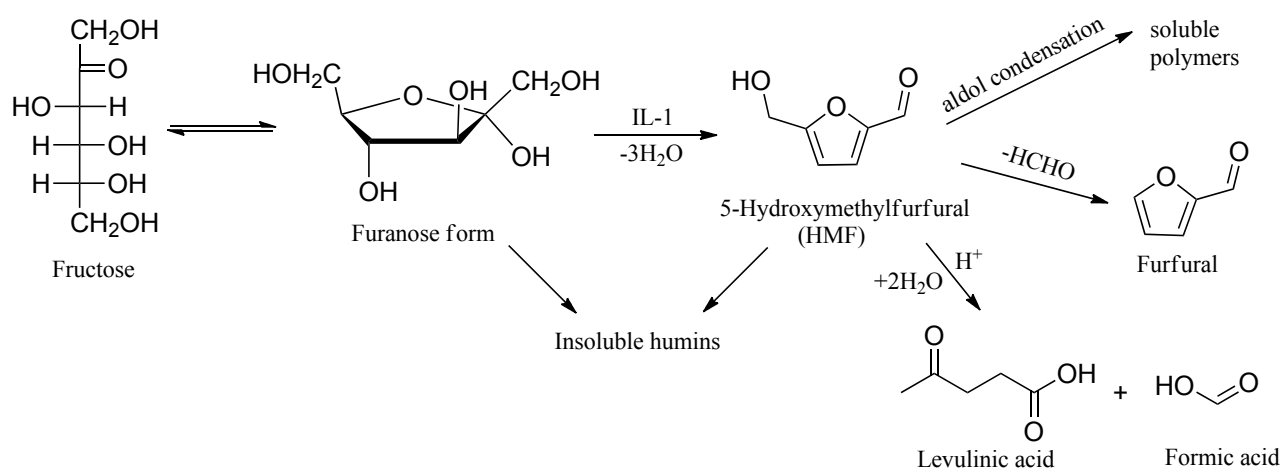

Supplement: c1ra00088h.pdf [file c1ra00088h.pdf]
